# Supplementary material for: The roles of growth conditions on the topotactic transformation from TiOF2 nanocubes to 3D hierarchical TiO2 nanoboxes
Source: Royal Society of Chemistry journal article supplement (doi:10.1039/c3ce00041a), 2013-01-01
Supplement: c3ce00041a.pdf [file c3ce00041a.pdf]

## Electronic Supplementary Information (ESI)

### The role of pH values and reaction temperatures on the topotactic transformation of TiOF<sub>2</sub> nanocubes to 3D hierarchical TiO<sub>2</sub> nanoboxes

Zeyan Wang,<sup>a</sup> Baibiao Huang,<sup>\*a</sup> Ying Dai,<sup>b</sup> Xianglin Zhu,<sup>a</sup> Yuanyuan Liu,<sup>a</sup> Xiaoyang Zhang,<sup>a</sup>  
Xiaoyan Qin,<sup>a</sup>

<sup>a</sup> State Key Laboratory of Crystal Materials and <sup>b</sup> School of Physics,

Shandong University, Jinan 250100, China

\*e-mail: [bbhuang@sdu.edu.cn](mailto:bbhuang@sdu.edu.cn)

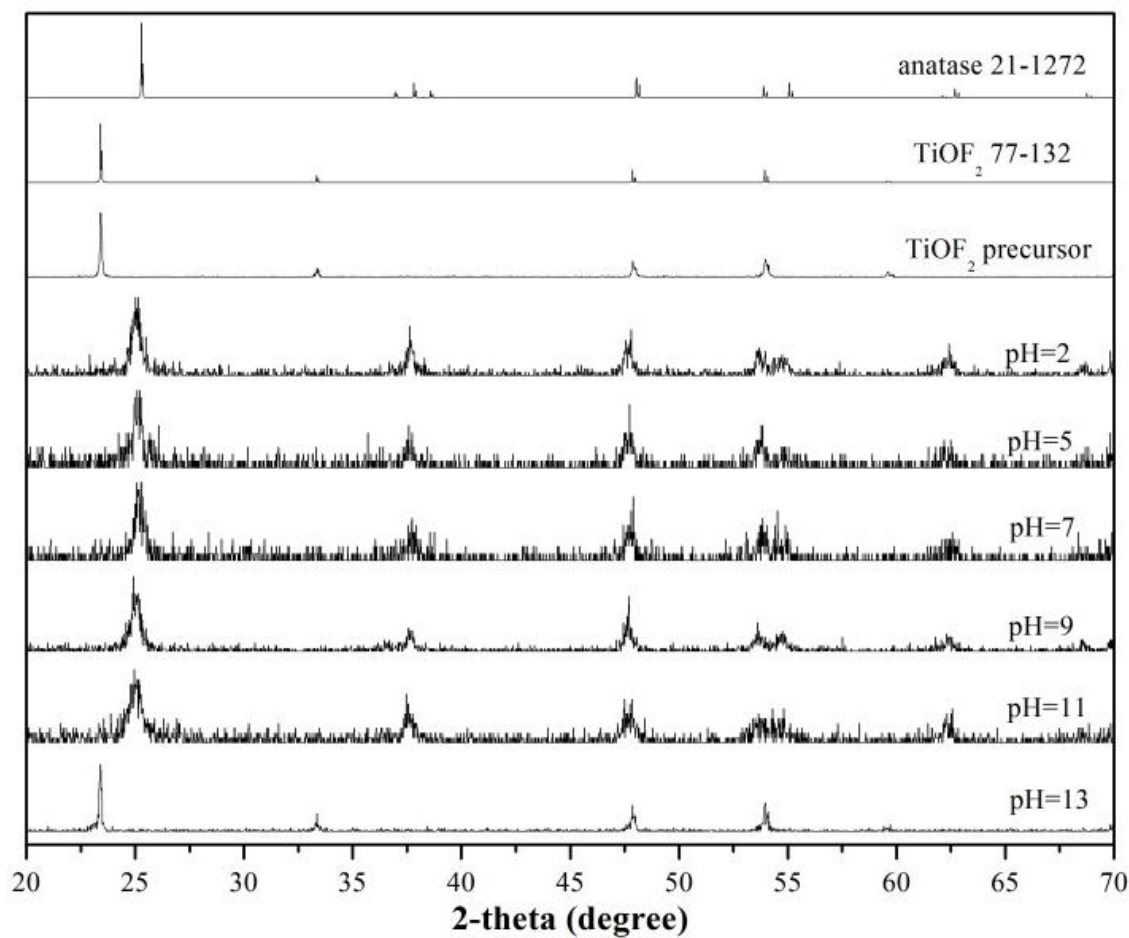

**Figure S1.** XRD patterns for the samples prepared under different pH values.

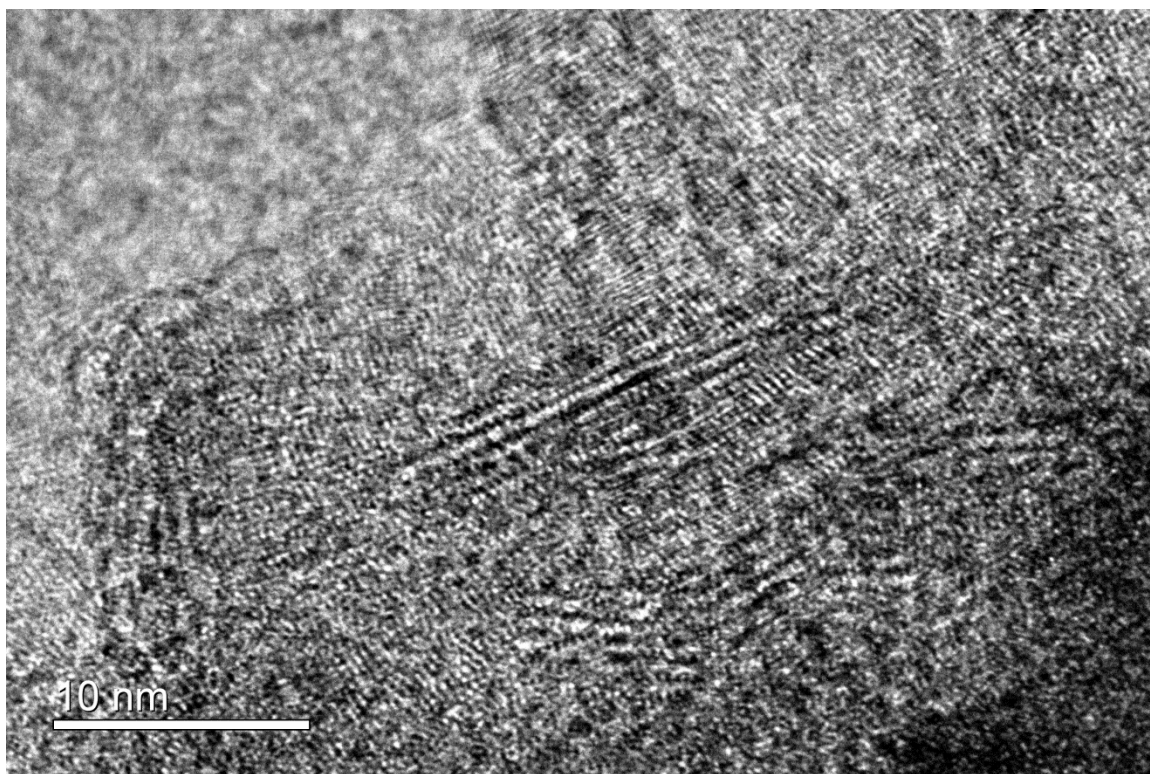

**Figure S2.** HRTEM image for the nanosheets on the surface of the sample prepared as pH=13.

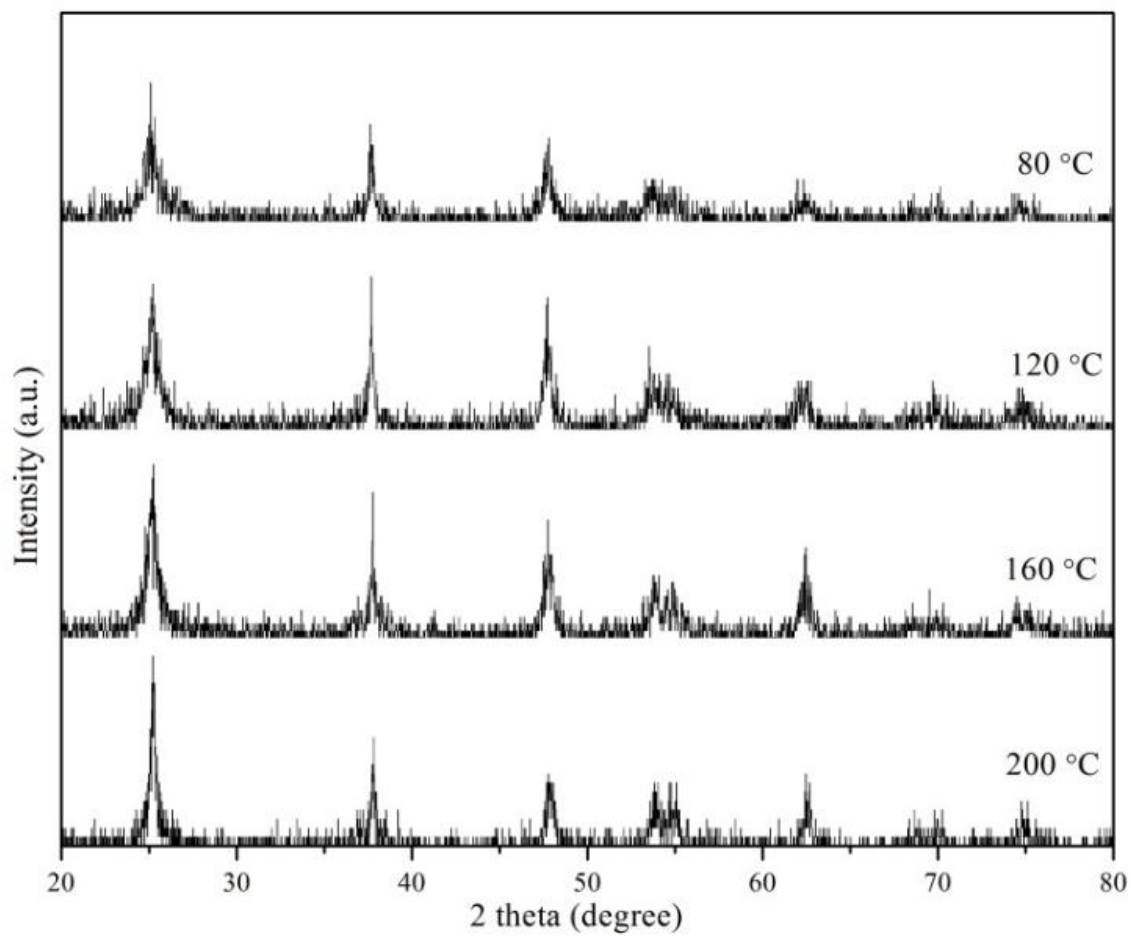

**Figure S3.** XRD patterns for the samples prepared under different temperatures.

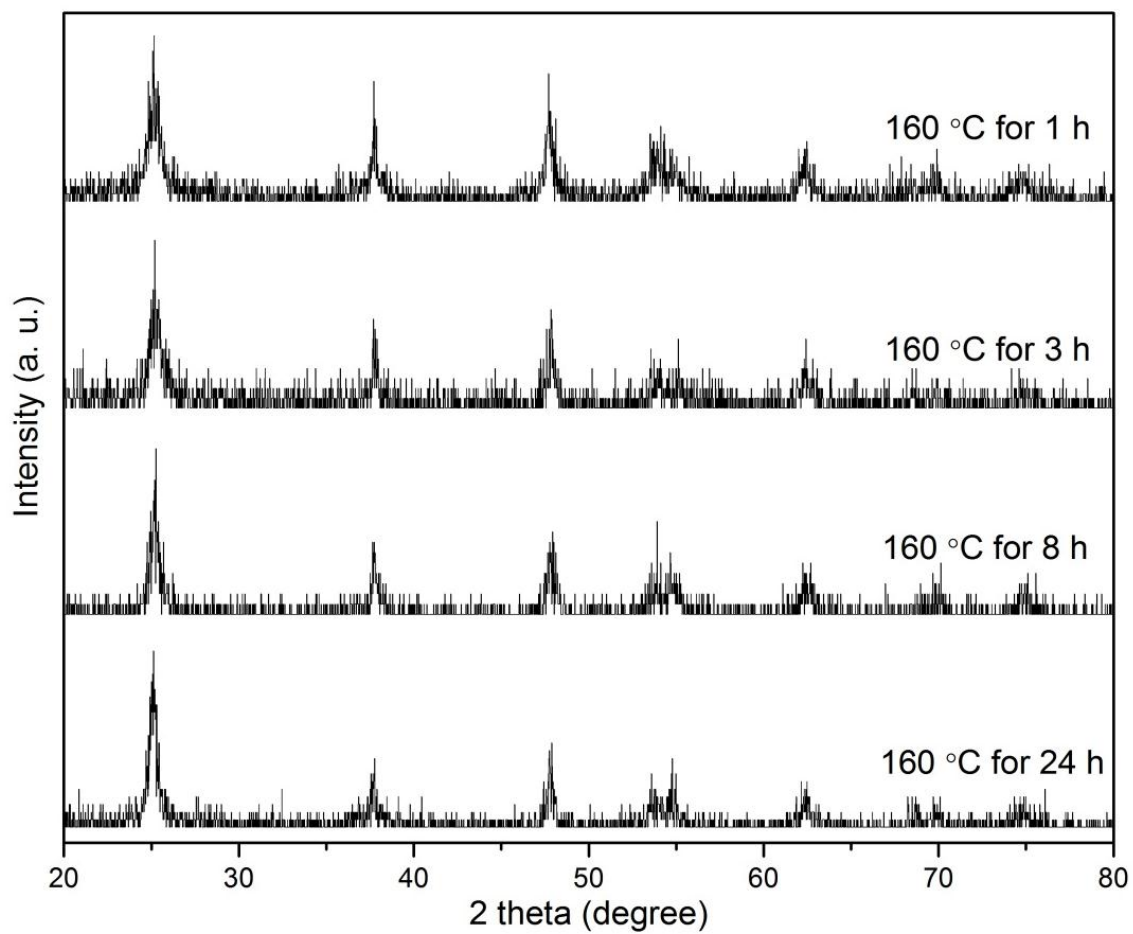

**Figure S4.** XRD patterns for the samples prepared with pH value of 11 under 160 °C for different times.
